# Supplementary material for: The fecal microbiota as a biomarker for disease activity in Crohn’s disease
Source: PubMed Central journal article supplement (PMC5062155; doi:10.1038/srep35216), 2016-10-13
Supplement: srep35216-s1.pdf [file srep35216-s1.pdf]

## **The fecal microbiota as a biomarker for disease activity in Crohn's disease**

**Danyta.I.Tedjo<sup>1,2</sup>, Agnieszka Smolinska<sup>3</sup>, Paul H. Savelkoul<sup>2</sup>, Ad A. Masclee<sup>1</sup>, Frederik J. van Schooten<sup>3</sup>**

**Marieke J. Pierik<sup>1</sup>, John Penders<sup>2\*</sup>, Daisy M. A. E. Jonkers<sup>1\*</sup>**

<sup>1</sup>School of Nutrition and Translational Research in Metabolism (NUTRIM), Division Gastroenterology-Hepatology, Maastricht University Medical Center+, Maastricht, The Netherlands.

<sup>2</sup>School of Nutrition and Translational Research in Metabolism (NUTRIM), Department of Medical Microbiology, Maastricht University Medical Center+, Maastricht, The Netherlands.

<sup>3</sup>School of Nutrition and Translational Research in Metabolism (NUTRIM), Department of Pharmacology & Toxicology, Maastricht University Medical Center+, Maastricht, The Netherlands.

- \*Shared last authorship

**Supplementary Figure 1A**

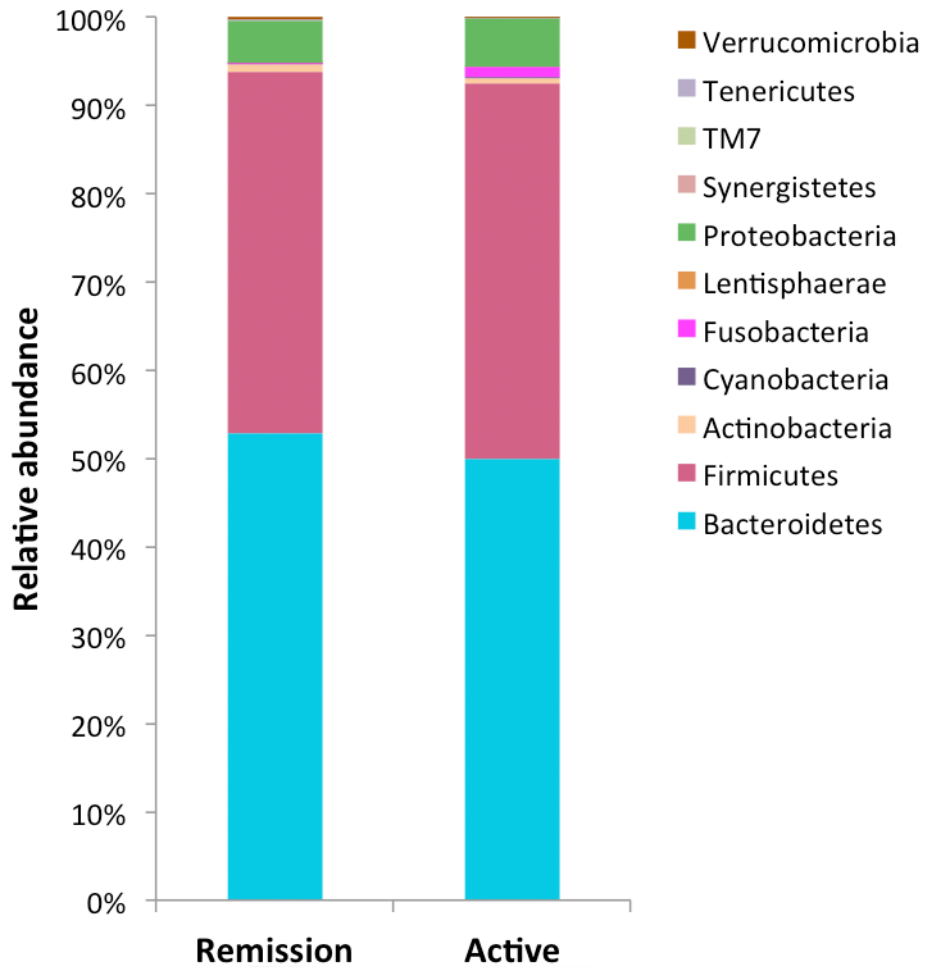

Supplementary Figure 1B

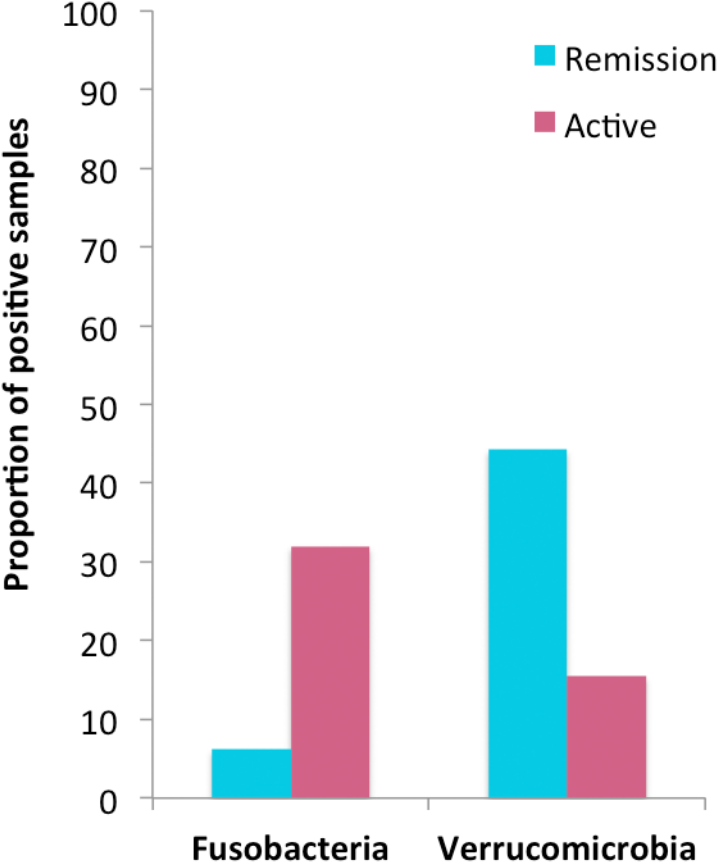

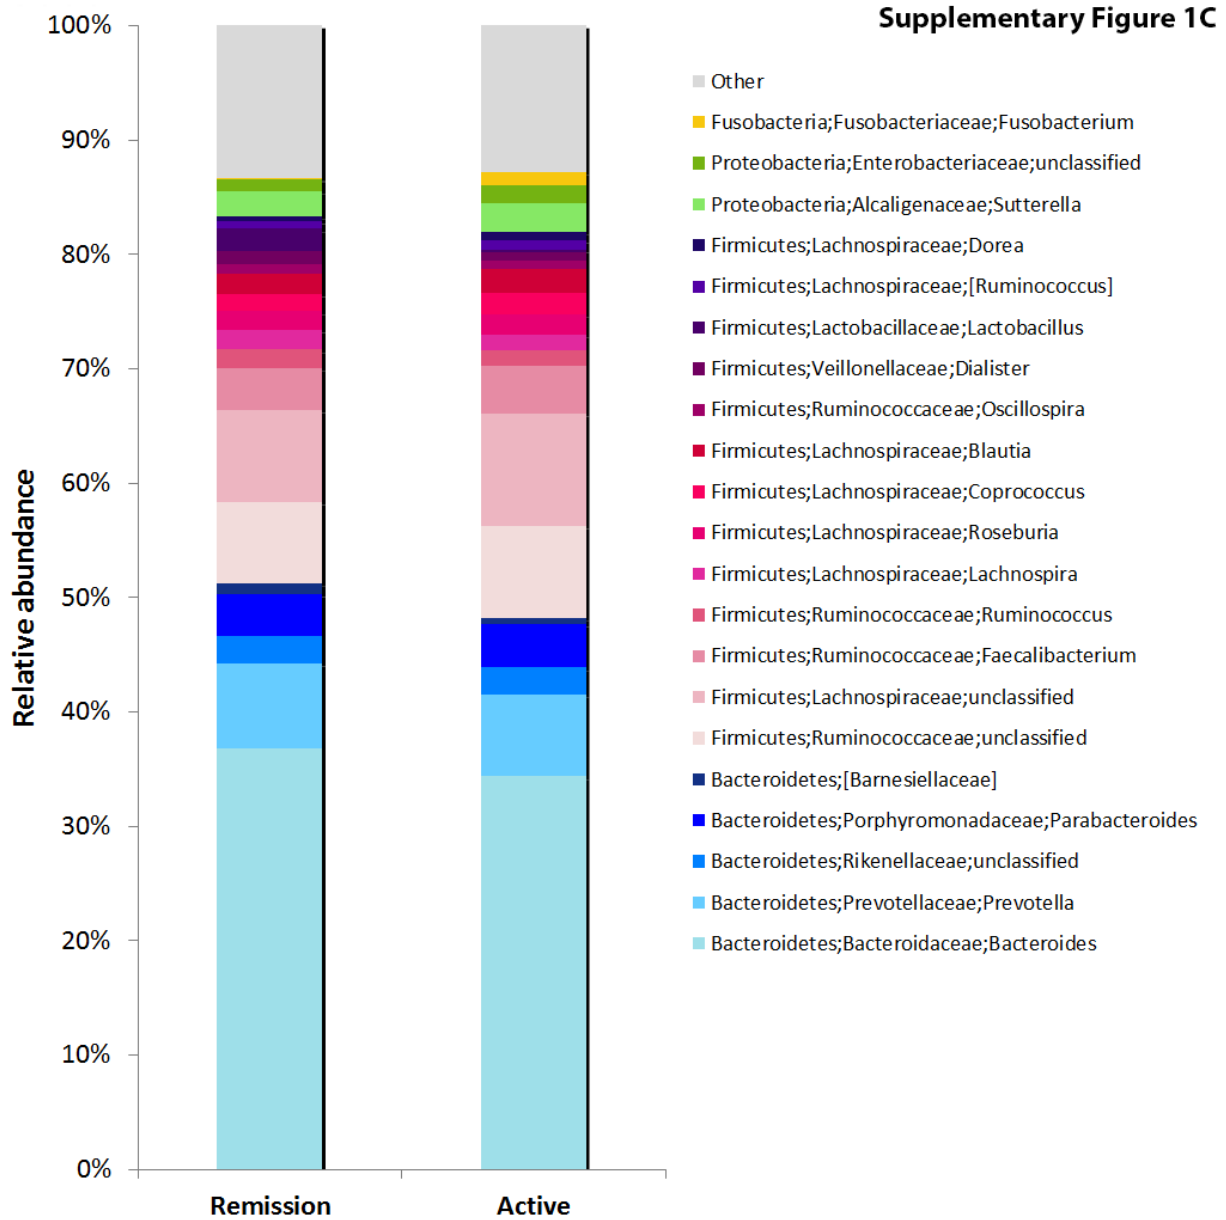

**Supplementary Figure 1. Microbial composition of samples from Crohn's Disease patients during remission and active disease.** A. Relative abundance of bacterial phyla. B. Proportion of samples containing Fusobacteria and Verrucomicrobia. C. Relative abundance of the most dominant bacterial genera (colored according to the respective phyla Bacteroidetes (blue), Firmicutes (pink - red – purple), Proteobacteria (green), Fusobacteria (yellow)).

Supplementary table S1. Proportion of samples positive and mean (std) read numbers in positive samples for each of the discriminatory set of 50 OTUs for individuals in active and remission.

| OTUs numbers | Active CD samples (N=97)           |                          | Remission CD samples (N=97)        |                          |
|--------------|------------------------------------|--------------------------|------------------------------------|--------------------------|
|              | Number of samples positive for OTU | Mean read number (STD)*  | Number of samples positive for OTU | Mean read number (STD)*  |
| 2949328      | 54                                 | 11,06 (22,5341808854039) | 30                                 | 12,40 (16,1001177978128) |
| 3439402      | 30                                 | 15,17 (35,1990236280471) | 22                                 | 13,86 (31,4904300724393) |
| 192225       | 23                                 | 2,04 (1,63702226534437)  | 9                                  | 1,56 (0,52704627669473)  |
| 289449       | 31                                 | 4,81 (5,21164948193762)  | 9                                  | 2,11 (1,05409255338946)  |
| 4381555      | 22                                 | 5,64 (8,79147560367674)  | 8                                  | 11,38 (13,8763673714907) |
| 292216       | 21                                 | 1,43 (0,870139561876632) | 10                                 | 1,10 (0,316227766016838) |
| 2447244      | 38                                 | 5,63 (9,09832492047101)  | 22                                 | 5,05 (5,35836926798828)  |
| 586453       | 5                                  | 1,40 (0,547722557505166) | 22                                 | 1,36 (0,902137912878521) |
| 193446       | 22                                 | 1,55 (0,962500351380158) | 20                                 | 1,35 (0,812727700887249) |
| 2771073      | 27                                 | 1,30 (0,541707756495413) | 14                                 | 2,57 (2,40877516638598)  |
| 363348       | 24                                 | 1,71 (1,73152776639507)  | 10                                 | 1,10 (0,316227766016838) |
| 4234212      | 13                                 | 2,31 (1,9315199276138)   | 38                                 | 7,97 (15,6265312194241)  |
| 215231       | 8                                  | 1,13 (0,353553390593274) | 25                                 | 1,56 (0,820568908339411) |
| 178920       | 19                                 | 1,26 (0,452413928358864) | 27                                 | 1,41 (0,747264717757073) |
| 583656       | 25                                 | 3,92 (3,49904748943671)  | 2                                  | 1,00 (0)                 |
| 180610       | 25                                 | 1,28 (0,541602560309064) | 12                                 | 1,17 (0,577350269189626) |
| 330458       | 27                                 | 1,89 (2,00640001635791)  | 24                                 | 1,63 (1,17260393995586)  |
| 179055       | 23                                 | 2,13 (1,57550418556574)  | 11                                 | 1,27 (0,467099366496914) |
| 4371302      | 27                                 | 1,52 (1,12216721537356)  | 22                                 | 1,86 (1,90976075653108)  |
| 177732       | 9                                  | 2,33 (1,5)               | 19                                 | 1,37 (0,683985568056769) |
| 362997       | 6                                  | 6,33 (9,81155781039212)  | 23                                 | 4,48 (4,27327386967152)  |
| 4460021      | 6                                  | 1,83 (1,32916013582513)  | 33                                 | 2,55 (2,69363728407925)  |
| 183824       | 24                                 | 1,42 (0,775531608229038) | 18                                 | 1,28 (0,460888598962477) |
| 195093       | 32                                 | 1,63 (1,07012209131602)  | 14                                 | 1,50 (0,85485041426511)  |
| 184021       | 28                                 | 2,07 (1,84448269227889)  | 24                                 | 1,96 (1,68055805086252)  |
| 187782       | 21                                 | 1,33 (0,658280588604383) | 10                                 | 2,00 (2)                 |
| 182903       | 27                                 | 1,81 (1,07549763211973)  | 17                                 | 1,76 (1,25146972419961)  |
| 4407387      | 22                                 | 1,68 (0,994574023980865) | 9                                  | 1,11 (0,333333333333333) |
| 178465       | 19                                 | 1,95 (1,61498827689334)  | 24                                 | 2,46 (2,37704907792005)  |
| 4471854      | 43                                 | 1,77 (1,26936822122784)  | 40                                 | 1,73 (1,26059611458332)  |
| 107044       | 30                                 | 8,80 (20,0935742001748)  | 19                                 | 37,00 (56,6048682633492) |
| 158331       | 11                                 | 2,91 (2,07145096270925)  | 32                                 | 3,84 (3,20392274684362)  |
| 191974       | 35                                 | 1,66 (1,34913604474378)  | 17                                 | 1,53 (0,874474632195206) |
| 179107       | 11                                 | 1,27 (0,646669790682863) | 19                                 | 1,21 (0,535303379031311) |
| 113909       | 49                                 | 2,94 (3,38752714174432)  | 33                                 | 2,79 (2,63103562971855)  |
| 4390134      | 33                                 | 6,76 (10,5030659304507)  | 22                                 | 9,23 (19,6757811442485)  |
| 360995       | 23                                 | 1,30 (0,558795995356872) | 16                                 | 1,06 (0,25)              |
| 192746       | 38                                 | 4,47 (5,17131820773871)  | 28                                 | 1,68 (1,46700933947825)  |
| 3797933      | 26                                 | 1,15 (0,464095480892257) | 9                                  | 1,33 (0,707106781186548) |
| 195029       | 27                                 | 2,93 (5,2909641838045)   | 12                                 | 2,33 (1,77525072919719)  |
| 189007       | 27                                 | 1,30 (0,541707756495413) | 19                                 | 1,16 (0,374634324632678) |
| 187894       | 28                                 | 2,43 (2,20149059651883)  | 12                                 | 1,17 (0,389249472080762) |
| 190990       | 74                                 | 10,36 (15,5559743395495) | 52                                 | 9,06 (9,27449266418271)  |
| 181056       | 32                                 | 3,38 (2,73271695121977)  | 35                                 | 2,94 (4,09406210722494)  |
| 191222       | 11                                 | 1,27 (0,646669790682863) | 30                                 | 2,20 (1,93693679244601)  |
| 198521       | 27                                 | 1,96 (1,34397463006852)  | 22                                 | 1,59 (0,908116360757433) |
| 366794       | 30                                 | 2,67 (3,42740812229615)  | 21                                 | 4,14 (5,91849401694143)  |
| 4456702      | 4                                  | 2,25 (2,5)               | 23                                 | 3,13 (4,71269415154516)  |
| 183873       | 21                                 | 1,33 (0,730296743340222) | 7                                  | 1,57 (0,786795792469443) |
| 2731539      | 22                                 | 3,36 (5,12273601139316)  | 7                                  | 46,43 (75,3720928524104) |

\*Mean (STD) read numbers are based upon samples positive for the specific OTU only.
